# Supplementary material
Source: PubMed Central journal article supplement (PMC7236076)
Supplement: BPH-177-2765-s001.pdf [file BPH-177-2765-s001.pdf]

1 **Supplementary Information for**

2

3 PKA facilitates relaxation of mouse ileum via phosphorylation of neuronal NO synthase

4

5

6 Damian D. Guerra, Rachael Bok, Ramón A. Lorca, and K. Joseph Hurt

7

8

9 Corresponding author: K. Joseph Hurt

10 Email: [K.Joseph.Hurt@CUAnschutz.edu](mailto:K.Joseph.Hurt@CUAnschutz.edu)

11

12

13

14 **This file includes:**

15 1. Supplemental Table and Legend

16 2. Supplemental Figures and Legends

17 Supplemental Table 1

| log(inhibitor) vs. normalized response -- Variable slope | WT                            |        |          |         |         | WT                                |        |        |          |
|----------------------------------------------------------|-------------------------------|--------|----------|---------|---------|-----------------------------------|--------|--------|----------|
|                                                          | Vehicle for kinase inhibitors | H-89   | Rp-cAMPs | Myr-PKI | MK-2206 | Vehicle for NO pathway inhibitors | cPTIO  | ODQ    | Rp-cGMPs |
| Replicates test for lack of fit                          |                               |        |          |         |         |                                   |        |        |          |
| SD replicates                                            | 12.84                         | 19.35  | 11.66    | 10.9    | 12.7    | 13.93                             | 23.01  | 16.8   | 11.49    |
| SD lack of fit                                           | 16.31                         | 10.8   | 11.14    | 12.56   | 9.425   | 15.93                             | 7.674  | 5.905  | 13.05    |
| Discrepancy (F)                                          | 1.614                         | 0.3115 | 0.9128   | 1.329   | 0.5508  | 1.308                             | 0.1112 | 0.1235 | 1.291    |
| P value                                                  | 0.1738                        | 0.9043 | 0.484    | 0.2807  | 0.737   | 0.2685                            | 0.9895 | 0.9867 | 0.2901   |
| Evidence of wrong model?                                 | No                            | No     | No       | No      | No      | No                                | No     | No     | No       |

  

| log(inhibitor) vs. normalized response -- Variable slope | nNOS <sup>S1412A</sup> |                        |                  |                               |        | nNOS <sup>S1412A</sup> + L-NAME |                               |         |         |
|----------------------------------------------------------|------------------------|------------------------|------------------|-------------------------------|--------|---------------------------------|-------------------------------|---------|---------|
|                                                          | WT                     | nNOS <sup>S1412A</sup> | nNOS $\alpha$ KO | Vehicle for kinase inhibitors | H-89   | MK-2206                         | Vehicle for kinase inhibitors | H-89    | MK-2206 |
| Replicates test for lack of fit                          |                        |                        |                  |                               |        |                                 |                               |         |         |
| SD replicates                                            | 13.56                  | 14.84                  | 11.43            | 13.56                         | 16.16  | 12.55                           | 14.77                         | 15.7    | 14.48   |
| SD lack of fit                                           | 13.51                  | 9.23                   | 15.07            | 6.014                         | 7.809  | 6.645                           | 8.845                         | 1.622   | 6.264   |
| Discrepancy (F)                                          | 0.9916                 | 0.3866                 | 1.739            | 0.1966                        | 0.2334 | 0.2803                          | 0.3588                        | 0.0107  | 0.1871  |
| P value                                                  | 0.459                  | 0.9273                 | 0.1279           | 0.9628                        | 0.9462 | 0.9213                          | 0.873                         | >0.9999 | 0.9659  |
| Evidence of wrong model?                                 | No                     | No                     | No               | No                            | No     | No                              | No                            | No      | No      |

  

| log(inhibitor) vs. normalized response -- Variable slope | eNOS KO                               |        |        |        | + L-NAME |                                |        |                        |                  |
|----------------------------------------------------------|---------------------------------------|--------|--------|--------|----------|--------------------------------|--------|------------------------|------------------|
|                                                          | Vehicle for kinase and NOS inhibitors | H-89   | MK     | L-NAME | eNOS KO  | eNOS KO nNOS <sup>S1412A</sup> | WT     | nNOS <sup>S1412A</sup> | nNOS $\alpha$ KO |
| Replicates test for lack of fit                          |                                       |        |        |        |          |                                |        |                        |                  |
| SD replicates                                            | 11.57                                 | 16.02  | 15.94  | 13.49  | 10.36    | 11.22                          | 15.72  | 13.51                  | 15.83            |
| SD lack of fit                                           | 8.746                                 | 7.543  | 7.923  | 10.57  | 8.636    | 10.74                          | 14.72  | 9.163                  | 14.82            |
| Discrepancy (F)                                          | 0.5718                                | 0.2216 | 0.2472 | 0.6138 | 0.6947   | 0.9161                         | 0.8767 | 0.4604                 | 0.8755           |
| P value                                                  | 0.7214                                | 0.9519 | 0.9389 | 0.6897 | 0.6318   | 0.4722                         | 0.5779 | 0.8828                 | 0.5006           |
| Evidence of wrong model?                                 | No                                    | No     | No     | No     | No       | No                             | No     | No                     | No               |

  

| log(inhibitor) vs. normalized response -- Variable slope | WT                         |        |        |        | WT + L-NAME                   |        |        |          |         |
|----------------------------------------------------------|----------------------------|--------|--------|--------|-------------------------------|--------|--------|----------|---------|
|                                                          | Vehicle for NOS inhibitors | NANT   | 1400W  | TTX    | Vehicle for kinase inhibitors | L-Arg  | H-89   | Rp-cAMPs | MK-2206 |
| Replicates test for lack of fit                          |                            |        |        |        |                               |        |        |          |         |
| SD replicates                                            | 10.02                      | 19.12  | 15.6   | 17.53  | 12.19                         | 10.6   | 15.53  | 16.66    | 15.58   |
| SD lack of fit                                           | 10.8                       | 10.56  | 12.3   | 14.89  | 8.856                         | 13.27  | 10.17  | 10.77    | 7.993   |
| Discrepancy (F)                                          | 1.162                      | 0.3053 | 0.6213 | 0.7213 | 0.5279                        | 1.568  | 0.4287 | 0.418    | 0.2632  |
| P value                                                  | 0.332                      | 0.9077 | 0.6843 | 0.6088 | 0.7543                        | 0.1868 | 0.8262 | 0.8335   | 0.9301  |
| Evidence of wrong model?                                 | No                         | No     | No     | No     | No                            | No     | No     | No       | No      |

  

| log(inhibitor) vs. normalized response -- Variable slope | WT                          |                         |        |                 |          | nNOS <sup>S1412A</sup> |                                | L-NAME |  |
|----------------------------------------------------------|-----------------------------|-------------------------|--------|-----------------|----------|------------------------|--------------------------------|--------|--|
|                                                          | Vehicle for EPAC inhibitors | Dideoxy-adenosine (DDA) | CE3F4  | CE3F4 + Myr-PKI | Non-NANC | Non-NANC               | eNOS KO nNOS <sup>S1412A</sup> | WT     |  |
| Replicates test for lack of fit                          |                             |                         |        |                 |          |                        |                                |        |  |
| SD replicates                                            | 12.75                       | 12.57                   | 9.332  | 6.55            | 12.07    | 8.271                  | 9.964                          | 8.96   |  |
| SD lack of fit                                           | 13.93                       | 5.142                   | 8.326  | 8.984           | 7.193    | 7.093                  | 7.314                          | 11.2   |  |
| Discrepancy (F)                                          | 1.193                       | 0.1674                  | 0.7961 | 1.881           | 0.355    | 0.7354                 | 0.5388                         | 1.56   |  |
| P value                                                  | 0.3288                      | 0.9732                  | 0.5555 | 0.1228          | 0.877    | 0.5997                 | 0.7462                         | 0.2    |  |
| Evidence of wrong model?                                 | No                          | No                      | No     | No              | No       | No                     | No                             | No     |  |

18 Supplemental Table 1: Goodness-of-fit tests for sigmoidal regressions. A replicates test with Prism  
19 indicates that individual data points for FSK dose-dependent relaxation do not significantly deviate from  
20 regression curves.

21 Supplemental Figure S1

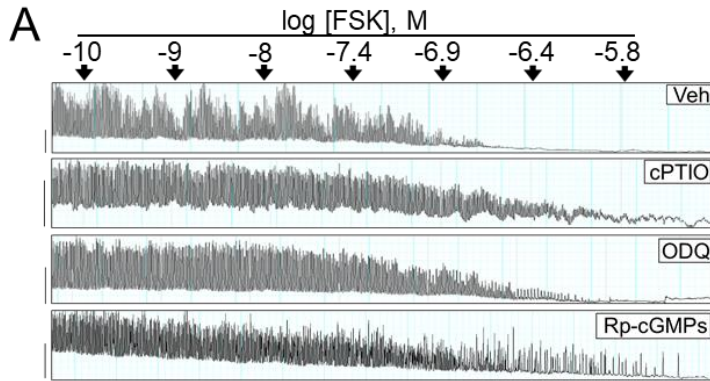

|          | Hill Slope<br>(95% C.I.)       | R <sup>2</sup> |
|----------|--------------------------------|----------------|
| Veh      | <b>-0.91</b><br>(-0.74, -1.16) | 0.87           |
| cPTIO    | <b>-0.71</b><br>(-0.50, -1.02) | 0.65           |
| ODQ      | <b>-0.89</b><br>(-0.70, -1.14) | 0.81           |
| Rp-cGMPs | <b>-0.89</b><br>(-0.69, -1.15) | 0.90           |

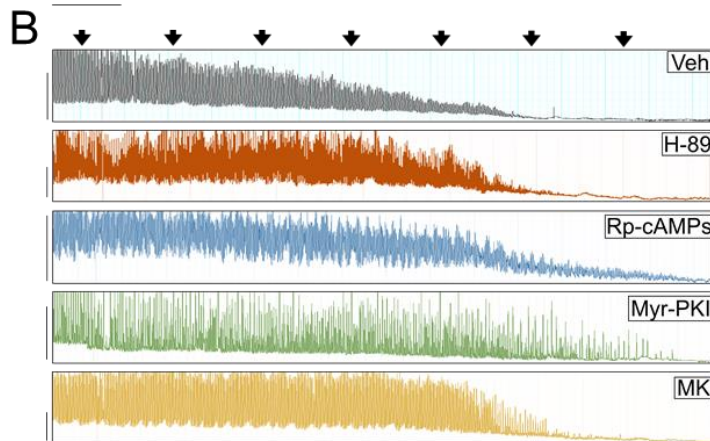

|          | Hill Slope<br>(95% C.I.)       | R <sup>2</sup> |
|----------|--------------------------------|----------------|
| Veh      | <b>-0.78</b><br>(-0.61, -1.0)  | 0.88           |
| H-89     | <b>-0.80</b><br>(-0.59, -1.08) | 0.75           |
| Rp-cAMPs | <b>-0.77</b><br>(-0.61, -0.98) | 0.89           |
| Myr-PKI  | <b>-0.64</b><br>(-0.53, -0.77) | 0.87           |
| MK       | <b>-0.86</b><br>(-0.73, -1.03) | 0.94           |

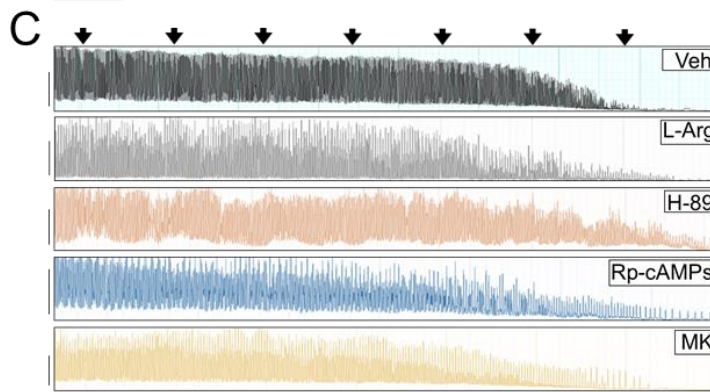

+ L-NAME

|          | Hill Slope<br>(95% C.I.)       | R <sup>2</sup> |
|----------|--------------------------------|----------------|
| Veh      | <b>-0.92</b><br>(-0.77, -1.11) | 0.88           |
| L-Arg    | <b>-0.98</b><br>(-0.80, -1.2)  | 0.91           |
| H-89     | <b>-0.78</b><br>(-0.59, -1.03) | 0.78           |
| Rp-cAMPs | <b>-0.88</b><br>(-0.63, -1.24) | 0.79           |
| MK       | <b>-1.13</b><br>(-0.82, -1.60) | 0.84           |

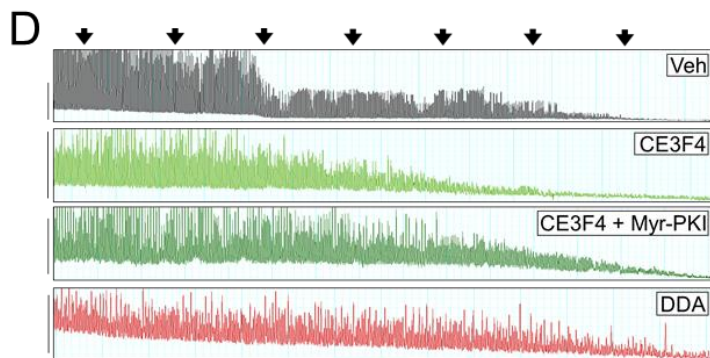

|                 | Hill Slope<br>(95% C.I.)       | R <sup>2</sup> |
|-----------------|--------------------------------|----------------|
| Veh             | <b>-0.55</b><br>(-0.45, -0.68) | 0.86           |
| CE3F4           | <b>-0.82</b><br>(-0.72, -0.93) | 0.92           |
| CE3F4 + Myr-PKI | <b>-0.70</b><br>(-0.61, -0.81) | 0.94           |
| DDA             | <b>-0.56</b><br>(-0.44, -0.72) | 0.81           |

23 **Supplemental Figure S1: PKA and Akt facilitate nitregeric FSK relaxation of ileum.** *Left:*  
24 Representative force-time plots. *Right:* Summary regression statistics. Hill coefficients are bold, and 95%  
25 confidence intervals are in parentheses. A. cPTIO, ODQ and Rp-cGMPs (NO signaling inhibitors)  
26 decrease sensitivity to FSK-dependent relaxation. B. H-89, Myr-PKI, and Rp-cAMPs (PKA inhibitors)  
27 and MK-2206 (Akt inhibitor) decrease sensitivity to FSK-dependent relaxation. C. Under NOS blockade  
28 with L-NAME, Akt and PKA inhibitors do not affect FSK-dependent ileal relaxation. L-Arg (NOS  
29 substrate) partially rescues L-NAME attenuation of FSK relaxation. D. EPAC and PKA inhibition  
30 additively attenuate FSK relaxation, and adenylyl cyclase inhibition attenuates relaxation as much as  
31 combined PKA and EPAC inhibition. Scale bars: 0.08g (A-C) and 0.12g (D) x 120 sec.

32 **Supplemental Figure S2**

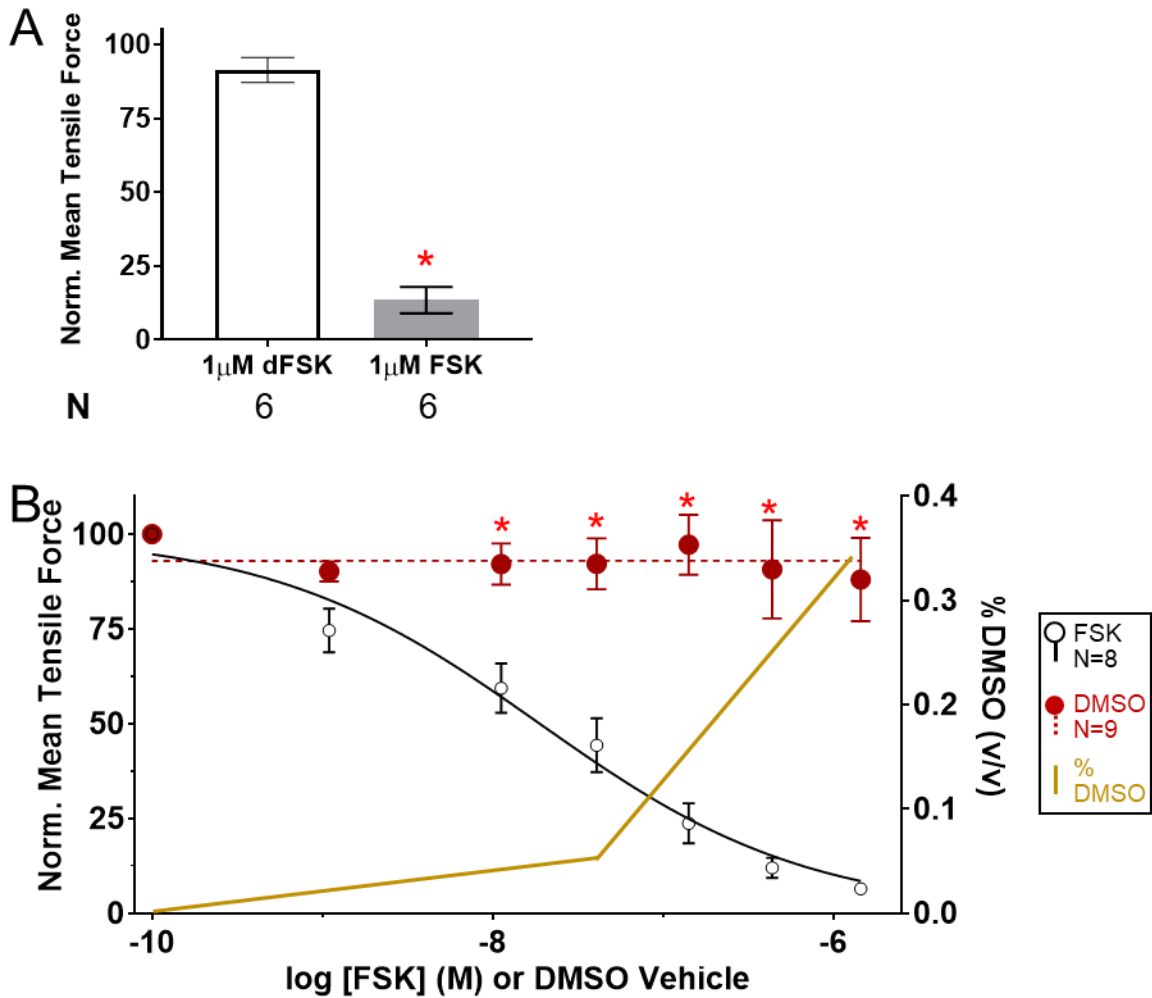

33

34 **Supplemental Figure S2: FSK relaxes WT ileal rings.** A. WT ileal rings relax when treated with 1 μM

35 FSK, but not with 1 μM 1,9-dideoxyforskolin (dFSK). B. Cumulative FSK relaxes WT ileal rings, but

36 cumulative DMSO vehicle does not. N: ileal rings. \*: p<0.05 vs dFSK (A) or vs. DMSO vehicle at each

37 [FSK] or [DMSO] (B) by Mann-Whitney tests.

38 Supplemental Figure S3

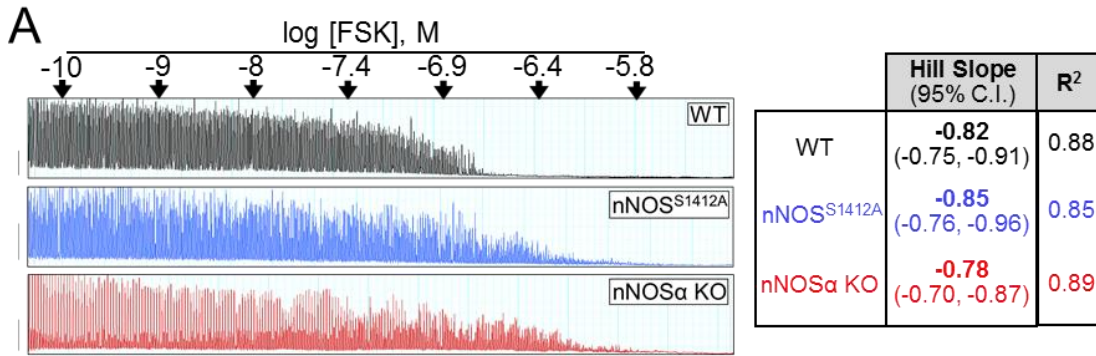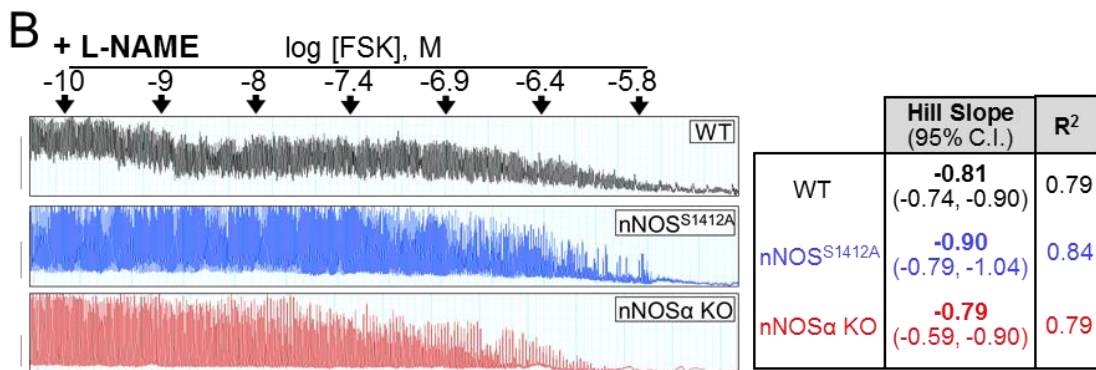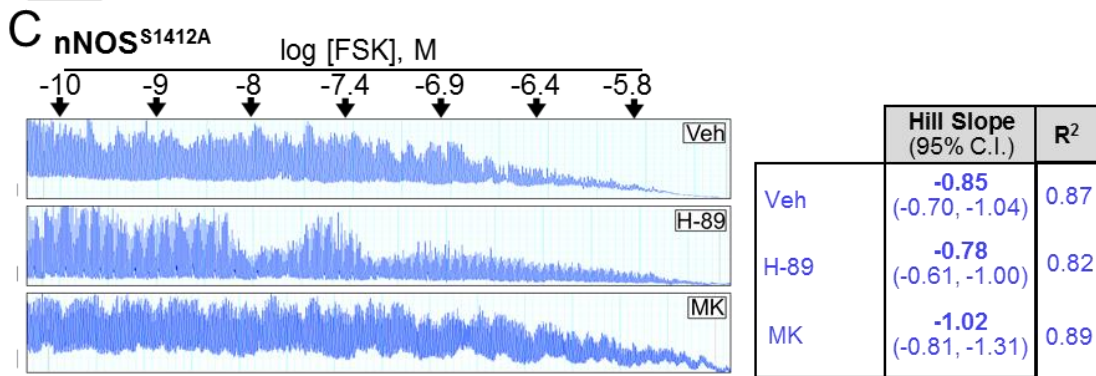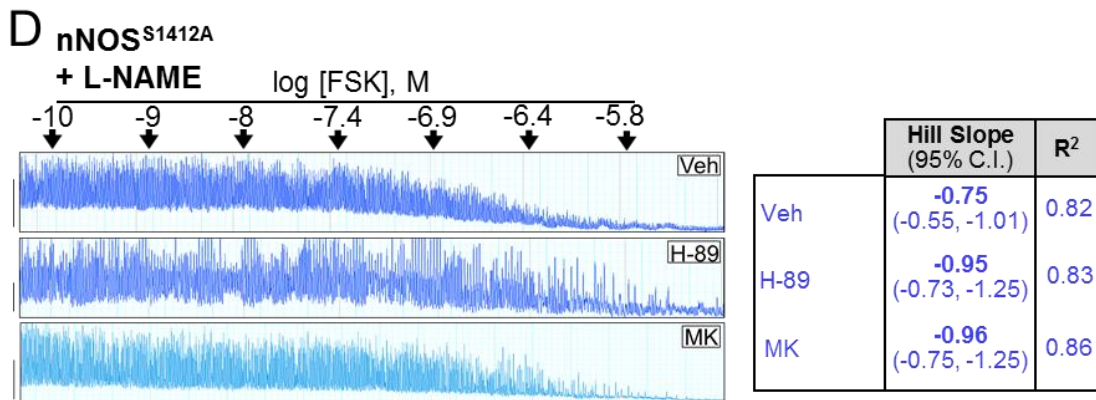

39

40

41 **Supplemental Figure S3: The nNOS<sup>S1412A</sup> and nNOS $\alpha$  KO mutations partially block nitregeric FSK**  
42 **relaxation of ileum.** *Left:* Representative force-time plots. *Right:* Summary regression statistics. Hill  
43 coefficients are bold, and 95% confidence intervals are in parentheses. A. FSK relaxation is reduced for  
44 nNOS<sup>S1412A</sup> and nNOS $\alpha$  KO ileal rings compared with WT ileal rings. B. In the presence of the NOS  
45 inhibitor L-NAME, WT, nNOS<sup>S1412A</sup>, and nNOS $\alpha$  KO ilea are equally sensitive to FSK relaxation. C.  
46 FSK relaxation of nNOS<sup>S1412A</sup> ilea is sensitive to MK (Akt inhibitor), but not to H-89 (PKA inhibitor). C.  
47 Under NOS blockade with L-NAME, Akt and PKA inhibitors do not affect FSK-dependent relaxation of  
48 nNOS<sup>S1412A</sup> ilea. Scale bars: 0.15g x 120 sec.

49 **Supplemental Figure S4**

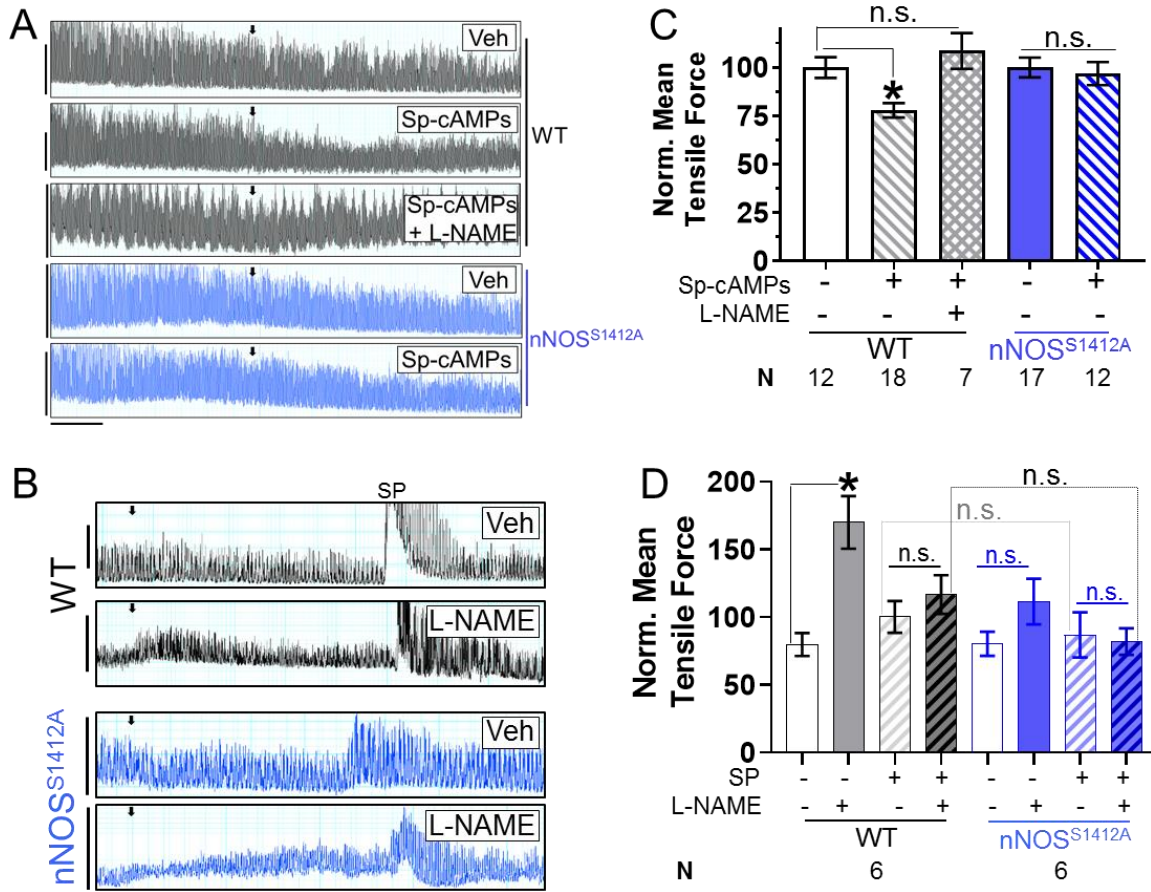

50  
 51 **Supplemental Figure S4: NO synthesis and nNOS Serine-1412 facilitate ileal relaxation.** A. L-  
 52 NAME (1mM) and the nNOS<sup>S1412A</sup> mutation curtail ileal relaxation induced by Sp-cAMPs (25μM). B.  
 53 The nNOS<sup>S1412A</sup> mutation attenuates L-NAME enhancement of basal ileal tone. Subsequent substance P  
 54 (SP) treatment abolishes differences in tensile force caused by L-NAME. C, D. Quantification of A, B. \*:   
 55 p<0.05 by Dunn's post tests after Kruskal-Wallis. n.s.: not significant. Veh: water. Scale bars: 0.13g x  
 56 120 sec (A) and 0.15g x 60 sec (B).



57 Supplemental Figure S5

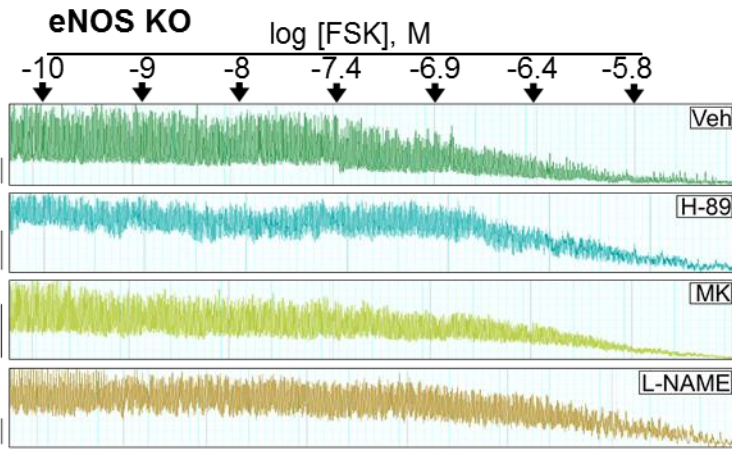

|        | Hill Slope<br>(95% C.I.)       | R <sup>2</sup> |
|--------|--------------------------------|----------------|
| Veh    | <b>-0.84</b><br>(-0.59, -0.98) | 0.89           |
| H-89   | <b>-0.74</b><br>(-0.59, -0.94) | 0.89           |
| MK     | <b>-0.65</b><br>(-0.51, -0.83) | 0.76           |
| L-NAME | <b>-0.81</b><br>(-0.64, -1.04) | 0.79           |

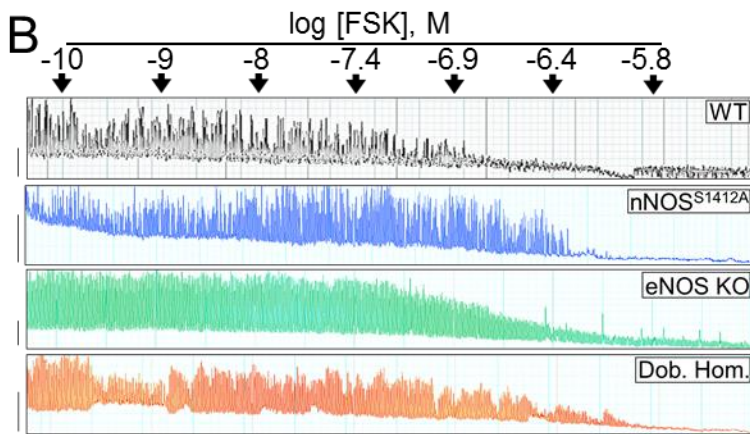

|                        | Hill Slope<br>(95% C.I.)       | R <sup>2</sup> |
|------------------------|--------------------------------|----------------|
| WT                     | <b>-0.82</b><br>(-0.75, -0.91) | 0.88           |
| nNOS <sup>S1412A</sup> | <b>-0.85</b><br>(-0.76, -0.96) | 0.85           |
| eNOS KO                | <b>-0.71</b><br>(-0.57, -0.90) | 0.90           |
| Dob. Hom.              | <b>-0.88</b><br>(-0.78, -0.98) | 0.90           |

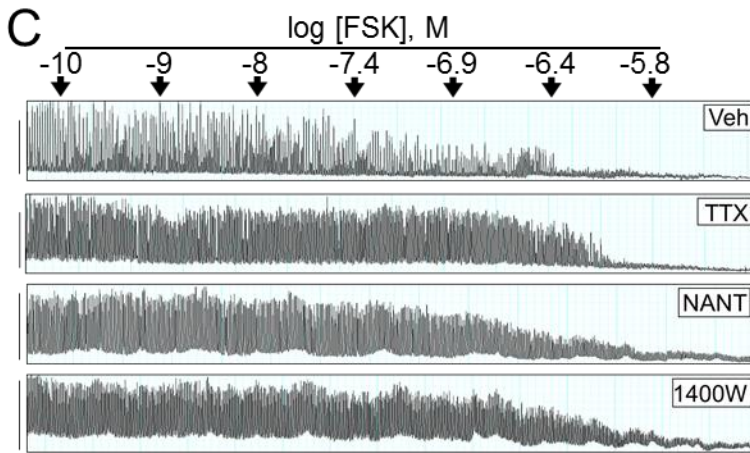

|       | Hill Slope<br>(95% C.I.)       | R <sup>2</sup> |
|-------|--------------------------------|----------------|
| Veh   | <b>-0.89</b><br>(-0.76, -1.05) | 0.93           |
| TTX   | <b>-0.90</b><br>(-0.73, -1.12) | 0.79           |
| NANT  | <b>-0.76</b><br>(-0.55, -1.06) | 0.74           |
| 1400W | <b>-0.63</b><br>(-0.48, -0.83) | 0.80           |

58

59

60 **Supplemental Figure S5: nNOS facilitates most nitrenergic FSK relaxation.** *Left:* Representative force-  
61 time plots. *Right:* Summary regression statistics. Hill coefficients are bold, and 95% confidence intervals  
62 are in parentheses. A. L-NAME (NOS inhibitor) and H-89 (PKA inhibitor) reduce eNOS KO ileal  
63 sensitivity to FSK relaxation, but MK (Akt inhibitor) has no effect on eNOS KO relaxation. B. Ilea from  
64 eNOS KO nNOS<sup>S1412A</sup> double homozygotes (Dob. Hom.) are as sensitive to FSK relaxation as eNOS KO  
65 and nNOS<sup>S1412A</sup> single mutants. C. TTX (neuronal depolarization inhibitor), NANT (specific nNOS  
66 inhibitor), and 1400W (selective iNOS/nNOS inhibitor) attenuate FSK relaxation of WT ileal rings. Scale  
67 bars: 0.08g (A-B) and 0.18g (C) x 120 sec.

68 Supplemental Figure S6

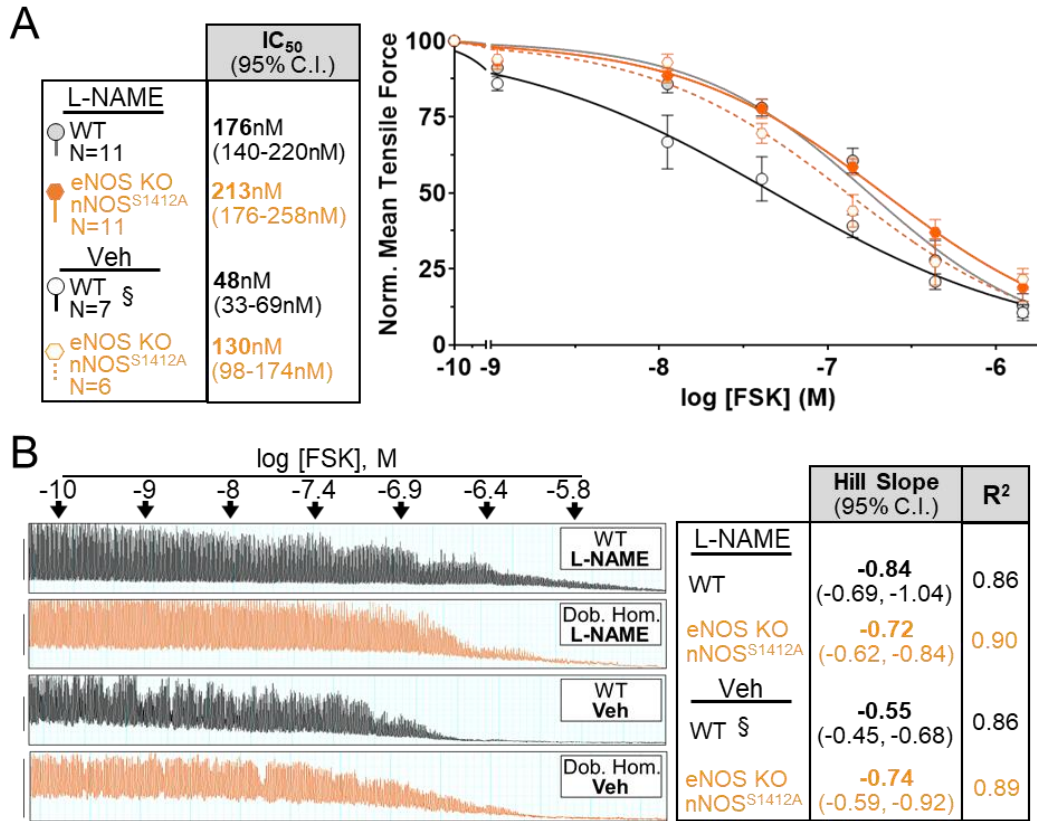

69

70 **Supplemental Figure S6: WT and eNOS KO nNOS<sup>S1412A</sup> ilea exhibit similar non-nitroergic FSK**  
 71 **relaxation.** A. FSK IC<sub>50</sub> values are the same for WT and eNOS KO and nNOS<sup>S1412A</sup> double mutants  
 72 treated with the NOS inhibitor L-NAME. B. Representative force-time plots and summary regression  
 73 statistics. §: Dataset from Fig. S1D for comparison. Scale bars: 0.12g x 120 sec.

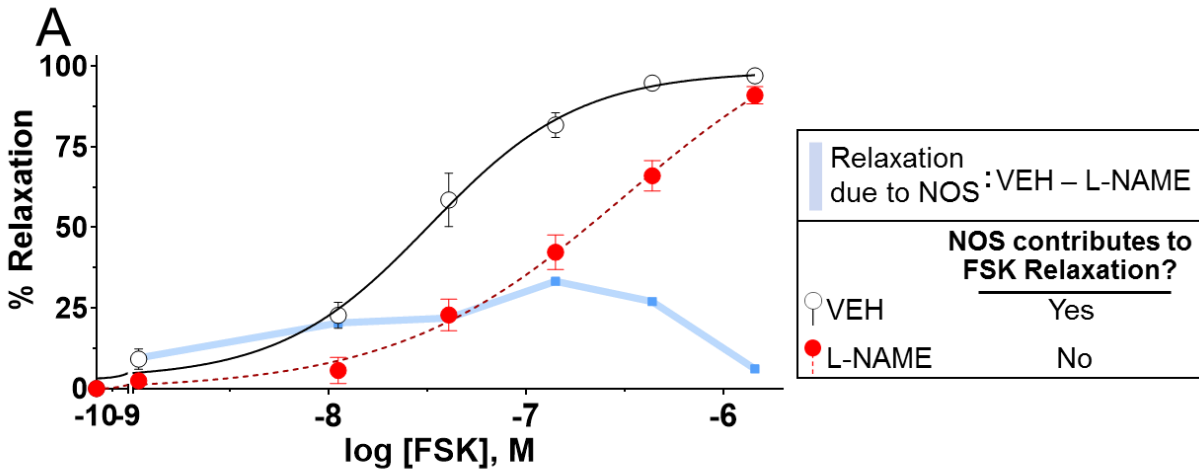

**B**

**% Relaxation**

| Log [FSK], M | WT   |        |      |      | eNOS KO |        | nNOS <sup>S1412A</sup> |        |      |
|--------------|------|--------|------|------|---------|--------|------------------------|--------|------|
|              | VEH  | L-NAME | NANT | H-89 | VEH     | L-NAME | VEH                    | L-NAME | H-89 |
| -8.96        | 12.0 | 2.5    | 8.8  | 7.4  | 4.9     | 4.2    | 5.3                    | 2.9    | 6.1  |
| -7.95        | 26.0 | 5.6    | 15.6 | 13.5 | 12.3    | 4.9    | 13.9                   | 6.1    | 16.0 |
| -7.39        | 44.7 | 22.8   | 26.0 | 29.6 | 25.2    | 17.0   | 31.4                   | 20.3   | 36.2 |
| -6.85        | 75.6 | 42.3   | 49.1 | 59.8 | 52.3    | 24.0   | 60.0                   | 45.5   | 54.6 |
| -6.36        | 93.0 | 66.0   | 73.0 | 72.4 | 75.7    | 48.3   | 78.6                   | 67.8   | 77.4 |
| -5.84        | 97.0 | 90.9   | 87.0 | 90.4 | 86.5    | 73.8   | 90.2                   | 88.6   | 92.5 |

**C**

**% Relaxation Due to NOS, nNOS, and PKA**

| Log [FSK], M | WT                  |                    |                   | eNOS KO             | nNOS <sup>S1412A</sup> |                   |
|--------------|---------------------|--------------------|-------------------|---------------------|------------------------|-------------------|
|              | NOS<br>VEH – L-NAME | nNOS<br>VEH – NANT | PKA<br>VEH – H-89 | NOS<br>VEH – L-NAME | NOS<br>VEH – L-NAME    | PKA<br>VEH – H-89 |
| -8.96        | 9.5                 | 3.2                | 4.6               | 0.7                 | 2.4                    | 0.0               |
| -7.95        | 20.4                | 10.4               | 12.5              | 7.4                 | 7.8                    | 0.0               |
| -7.39        | 21.9                | 18.7               | 15.1              | 8.2                 | 11.1                   | 0.0               |
| -6.85        | 33.3                | 26.5               | 15.8              | 28.3                | 14.5                   | 5.4               |
| -6.36        | 27.0                | 20.0               | 20.6              | 27.4                | 10.8                   | 1.2               |
| -5.84        | 6.1                 | 10.0               | 6.6               | 12.7                | 1.6                    | 0.0               |

75  
76  
77  
78  
79

80 **Supplemental Figure S7: Contributions of NO synthesis and PKA to absolute (total) ileal**  
81 **relaxation.** A. Graphical representation of percent relaxation due to NO synthesis: the absolute difference  
82 in percent relaxation with vehicle and L-NAME at each [FSK]. B. Percent relaxation for WT, eNOS KO,  
83 and nNOS<sup>S1412A</sup> ileal rings treated with vehicle, L-NAME (NO synthesis inhibitor), NANT (nNOS  
84 inhibitor), or H-89 (PKA inhibitor). The first two columns (WT treated with vehicle or L-NAME) are  
85 depicted in A. C. Total percent relaxation of WT, eNOS KO, or nNOS<sup>S1412A</sup> ileal rings due to NO  
86 synthesis, nNOS, or PKA. The first column (WT relaxation due to NO synthesis) is depicted in A. The  
87 first row of each column includes the formula to calculate percent relaxation.

88

89

90

91

92

93

94

95

96

97

98

99

100

101

102

103

104

105

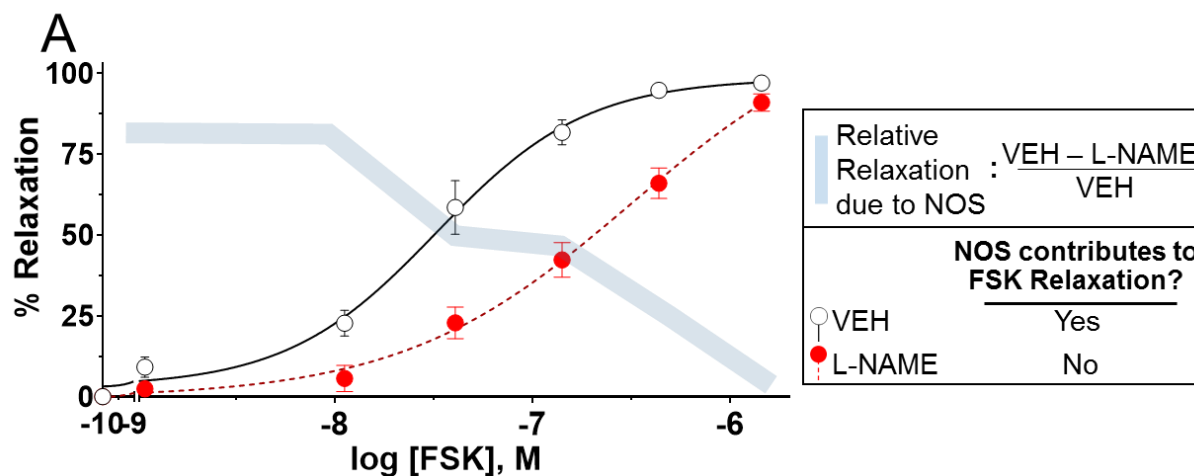

**B**

**% Relaxation**

| Log [FSK], M | WT   |        |      |      | eNOS KO |        | nNOS <sup>S1412A</sup> |        |      |
|--------------|------|--------|------|------|---------|--------|------------------------|--------|------|
|              | VEH  | L-NAME | NANT | H-89 | VEH     | L-NAME | VEH                    | L-NAME | H-89 |
| -8.96        | 12.0 | 2.5    | 8.8  | 7.4  | 4.9     | 4.2    | 5.3                    | 2.9    | 6.1  |
| -7.95        | 26.0 | 5.6    | 15.6 | 13.5 | 12.3    | 4.9    | 13.9                   | 6.1    | 16.0 |
| -7.39        | 44.7 | 22.8   | 26.0 | 29.6 | 25.2    | 17.0   | 31.4                   | 20.3   | 36.2 |
| -6.85        | 75.6 | 42.3   | 49.1 | 59.8 | 52.3    | 24.0   | 60.0                   | 45.5   | 54.6 |
| -6.36        | 93.0 | 66.0   | 73.0 | 72.4 | 75.7    | 48.3   | 78.6                   | 67.8   | 77.4 |
| -5.84        | 97.0 | 90.9   | 87.0 | 90.4 | 86.5    | 73.8   | 90.2                   | 88.6   | 92.5 |

**C**

**Relative Relaxation Due to NOS, nNOS, and PKA**

| Log [FSK], M | WT                                              |                                               |                                               | eNOS KO                                         | nNOS <sup>S1412A</sup>                          |                                               |
|--------------|-------------------------------------------------|-----------------------------------------------|-----------------------------------------------|-------------------------------------------------|-------------------------------------------------|-----------------------------------------------|
|              | <b>NOS</b>                                      | <b>nNOS</b>                                   | <b>PKA</b>                                    | <b>NOS</b>                                      | <b>NOS</b>                                      | <b>PKA</b>                                    |
|              | $\frac{\text{VEH} - \text{L-NAME}}{\text{VEH}}$ | $\frac{\text{VEH} - \text{NANT}}{\text{VEH}}$ | $\frac{\text{VEH} - \text{H-89}}{\text{VEH}}$ | $\frac{\text{VEH} - \text{L-NAME}}{\text{VEH}}$ | $\frac{\text{VEH} - \text{L-NAME}}{\text{VEH}}$ | $\frac{\text{VEH} - \text{H-89}}{\text{VEH}}$ |
| -8.96        | 79.2                                            | 50.0                                          | 38.3                                          | 14.3                                            | 45.3                                            | 0.0                                           |
| -7.95        | 78.5                                            | 36.2                                          | 48.1                                          | 60.2                                            | 56.1                                            | 0.0                                           |
| -7.39        | 49.0                                            | 12.5                                          | 33.8                                          | 32.5                                            | 35.4                                            | 0.0                                           |
| -6.85        | 44.0                                            | 41.3                                          | 20.9                                          | 54.1                                            | 24.2                                            | 9.0                                           |
| -6.36        | 29.0                                            | 25.4                                          | 22.2                                          | 36.2                                            | 13.7                                            | 1.5                                           |
| -5.84        | 6.3                                             | 11.8                                          | 6.8                                           | 14.7                                            | 1.8                                             | 0.0                                           |

107  
108  
109  
110  
111

112 **Supplemental Figure S8: Relative ileal relaxation by FSK due to NO synthesis or PKA.** This method  
113 calculates the proportion of relaxation at a particular [FSK] due to NO synthesis or PKA, relative to  
114 control relaxation at the same [FSK]. Thus, nitregeric relaxation is the difference in percent relaxation with  
115 vehicle and L-NAME, divided by percent relaxation with vehicle, at each [FSK]. A. Graphical depiction.  
116 B. Percent relaxation for WT, eNOS KO, and nNOS<sup>S1412A</sup> ileal rings treated with vehicle, L-NAME,  
117 NANT, or H-89 during FSK relaxation. C. Relative percent relaxation of WT, eNOS KO, or nNOS<sup>S1412A</sup>  
118 ileal rings due to NO synthesis, nNOS, or PKA. The first row of each column includes the formula used  
119 to calculate percent relaxation values for that column.
